# Supplementary material
Source: publisher site journal article supplement (https://www.dovepress.com/article/398446)
Supplement: Supplementary file 1 [file get_supplementary_file.php]

**Supp. table 1 Reagents**

| Reagents                                                           | Product code    | Company     |
|--------------------------------------------------------------------|-----------------|-------------|
| L-DMEM                                                             | G4520-500ML     | Servicebio  |
| FBS                                                                | C04001          | Vivacell    |
| BMSCs osteogenic differentiation medium                            | PD-008          | Procell     |
| BMSCs adipogenic differentiation medium                            | PD-010          | Procell     |
| BMSCs chondrogenic differentiation medium                          | PD-009          | Procell     |
| Anti-CD29/Alexa Fluor 488 antibody                                 | bs-20630R-AF488 | Bioss       |
| Anti-CD90/Alexa Fluor 488 antibody                                 | bs-0778R-AF488  | Bioss       |
| Anti-CD44/Alexa Fluor 488 antibody                                 | bs-4916R-AF488  | Bioss       |
| Anti-CD34/Alexa Fluor 488 antibody                                 | bs-9752R-AF488  | Bioss       |
| Anti-CD68/Alexa Fluor 488 antibody                                 | bs-20403R-AF488 | Bioss       |
| Rabbit IgG/Alexa Fluor 488                                         | bs-0295P-AF488  | Bioss       |
| Alizarin red S staining kit                                        | C0148S          | Beyotime    |
| 0.8mm Kirschner                                                    |                 | Zimmer      |
| 5-0 absorbable band                                                |                 | Ethicon     |
| Transwell chambers (1 $\mu$ m pore size)                           | TCS005012       | Biofil      |
| CSF                                                                | HY-P7386        | MCE         |
| Tissue RNA extraction kit                                          | G3640-50T       | Servicebio  |
| SweScript All-in-One First-Strand cDNA Synthesis SuperMix for qPCR | G3337-100       | Servicebio  |
| 2 $\times$ Universal Blue SYBR Green qPCR Master Mix               | G3326-05        | Servicebio  |
| Cell supernatant exosome extraction kit                            | EX0011          | Solarbio    |
| DiD                                                                | D4019           | Yuheng      |
| DiO                                                                | D4007           | Yuheng      |
| Free endotoxin plasmid extraction maxi kit                         | D1150-10T       | Solarbio    |
| Anti-CD206 antibody                                                | 18704-1-AP      | Proteintech |
| Anti-CD86 antibody                                                 | E8ET1606-50     | EnoGene     |

## Western blot

Western blot was used to identify the exosomes and performed as described previously. Briefly, exosomes suspension was lysed in RIPA buffer (R0010, Solarbio, China) with 1mM phenylmethylsulfonyl fluoride (PMSF). Proteins were separated by 10% SDS-PAGE gel and transferred to a 0.2 um PVDF membrane. Then, the membranes were blocked for one hour at room temperature in blocking buffer (P30500, NCM Biotech, China) and incubated with primary antibodies overnight at 4 °C. After washed by TBST for 3 times, the membranes were incubated with secondary antibodies for 2 h. The protein bands were visualized with Odyssey infrared imaging system (LI - COR Biosciences). The antibodies were listed as follows: anti-Alix (DF9027, Affinity Biosciences, 1:2000), anti-CD63 (AF5117, Affinity Biosciences, 1:1000), anti-TSG101 (DF8427, Affinity Biosciences, 1:2000), anti-CD9 (AF5139, Affinity Biosciences, 1:1000), anti-GAPDH (AF7021, Affinity Biosciences, 1:10000), anti - rabbit secondary antibodies conjugated to 680 IRDye fluorophores (LI - COR Biosciences, 1:15000). (Fig.1-5)

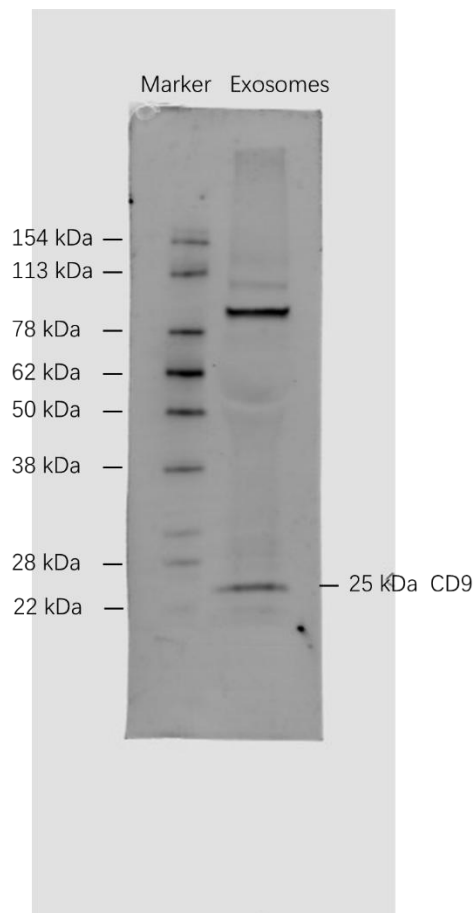

Supp. Figure 1 CD9 expression results in exosomes.

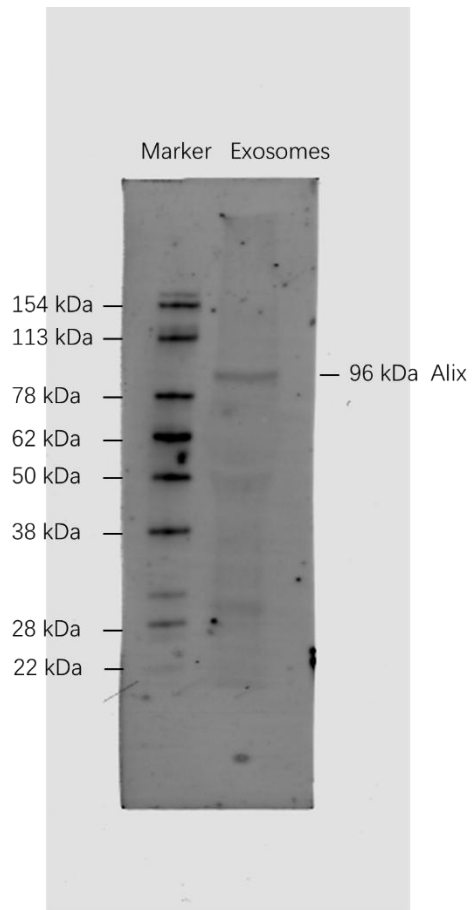

Supp. Figure 2 Alix expression results in exosomes.

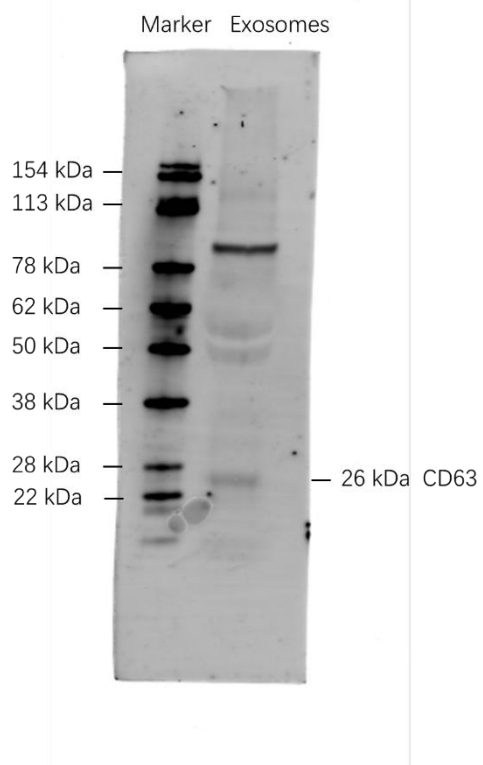

Supp. Figure 3 CD63 expression results in exosomes.

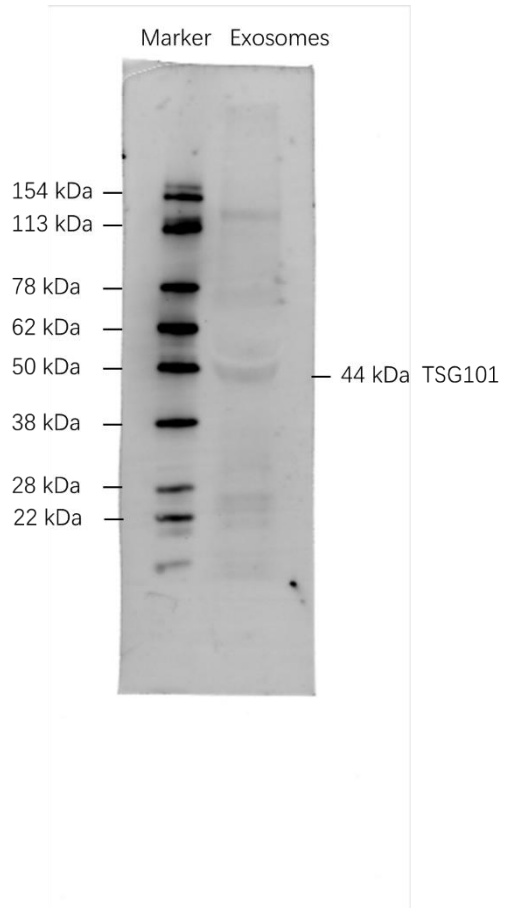

Supp. Figure 4 TSG101 expression results in exosomes.

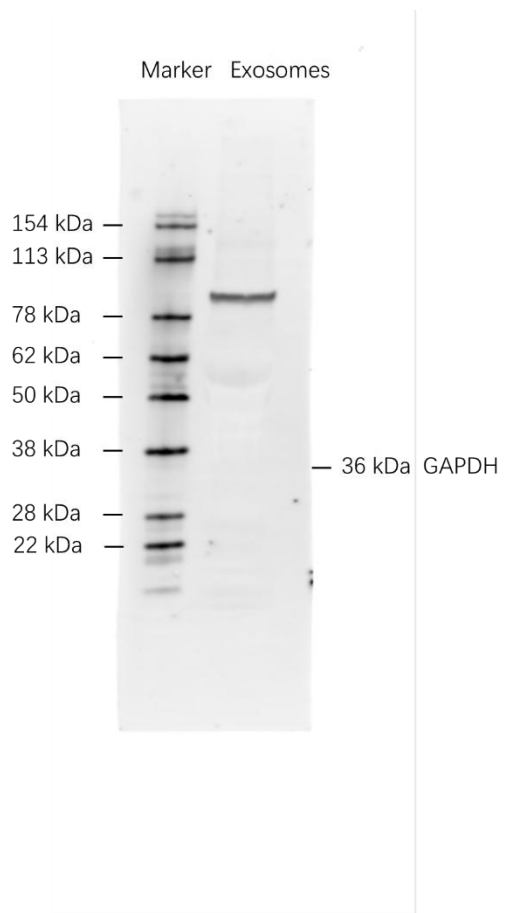

Supp. Figure 5 GAPDH expression results in exosomes.
